# Plasma Connective Tissue Growth Factor Is an Independent Predictor of End-Stage Renal Disease and Mortality in Type 1 Diabetic Nephropathy

TRI Q. NGUYEN, MD<sup>1</sup>  
LISE TARNOW, MD, DMSC<sup>2</sup>  
ANDERS JORSAL,<sup>2</sup>  
NOELLYN OLIVER, PHD<sup>3</sup>  
PEGGY ROESTENBERG, PHD<sup>1</sup>

YASUHIKO ITO, MD<sup>4</sup>  
HANS-HENRIK PARVING, MD, DMSC<sup>5,6</sup>  
PETER ROSSING, MD, DMSC<sup>2</sup>  
FRANS A. VAN NIEUWENHOVEN, PHD<sup>1</sup>  
ROEL GOLDSCHMEDING, MD, PHD<sup>1</sup>

**OBJECTIVE** — We evaluated the predictive value of baseline plasma connective tissue growth factor (CTGF) in a prospective study of patients with type 1 diabetes.

**RESEARCH DESIGN AND METHODS** — Subjects were 198 type 1 diabetic patients with established diabetic nephropathy and 188 type 1 diabetic patients with persistent normoalbuminuria. Follow-up time was 12.8 years. Prediction of end-stage renal disease (ESRD) and mortality by plasma CTGF was analyzed in conjunction with conventional risk factors.

**RESULTS** — Plasma CTGF was higher in patients with nephropathy than in patients with normoalbuminuria (median 381 [interquartile range 270–630] vs. 235 [168–353] pmol/l). In patients with nephropathy, elevated plasma CTGF was an independent predictor of ESRD (covariate-adjusted hazard ratio [HR] 1.6 [95% CI 1.1–2.5]) and correlated with the rate of decline in glomerular filtration rate (GFR) (cumulative  $R = 0.46$ ). Area under the receiver operating characteristic curve for prediction of ESRD was 0.72. Plasma CTGF above a cutoff level of 413 pmol/l predicted ESRD with a sensitivity of 73% and a specificity of 63% and was associated with a higher rate of decline in GFR (mean  $\pm$  SD  $5.4 \pm 4.9$  vs.  $3.3 \pm 3.5$  ml/min per  $1.73 \text{ m}^2$  per year). Moreover, in patients with nephrotic range albuminuria ( $>3 \text{ g/day}$ ), plasma CTGF was the only predictor of ESRD (covariate-adjusted HR 4.5 [2.0–10.4]). Plasma CTGF was an independent predictor also of overall mortality (covariate-adjusted HR 1.4 [1.1–1.7]). In contrast, in normoalbuminuric patients, plasma CTGF did not correlate with clinical parameters and did not predict outcome.

**CONCLUSIONS** — Plasma CTGF contributes significantly to prediction of ESRD and mortality in patients with type 1 diabetic nephropathy.

*Diabetes Care* 31:1177–1182, 2008

**D**iabetic nephropathy is the most important cause of end-stage renal disease (ESRD) and contributes significantly to mortality, mainly through increases in cardiovascular disease (1).

However, the course of diabetic nephropathy remains unpredictable, and the pathogenesis of progression is not completely understood.

Connective tissue growth factor

From <sup>1</sup>Pathology, University Medical Center Utrecht, Utrecht, the Netherlands, the <sup>2</sup>Steno Diabetes Center, Gentofte, Denmark, <sup>3</sup>FibroGen, South San Francisco, California; <sup>4</sup>Nephrology, Nagoya University School of Medicine, Nagoya, Japan; <sup>5</sup>Endocrinology, Rigshospitalet, Copenhagen, Denmark; and the <sup>6</sup>Faculty of Health Science, Aarhus University, Aarhus, Denmark.

Corresponding author: R. Goldschmeding, MD, PhD, UMC Utrecht, Department of Pathology, Heidelberglaan 100, 3584 CX, Utrecht, Netherlands. E-mail: r.goldschmeding@umcutrecht.nl.

Received for publication 31 December 2007 and accepted in revised form 7 March 2008.

Published ahead of print at <http://care.diabetesjournals.org> on 14 March 2008. DOI: 10.2337/dc07-2469.

P.G. is currently affiliated with Biochemistry, Radboud University Nijmegen Medical Centre, Nijmegen, the Netherlands. F.A.N. is currently affiliated with Physiology, Cardiovascular Research, Institute Maastricht (CARIM), Maastricht University, Maastricht, the Netherlands.

R.G. has received research support grants and consulting fees from FibroGen.

**Abbreviations:** CTGF, connective tissue growth factor; ESRD, end-stage renal disease; GFR, glomerular filtration rate; ROC, receiver operating characteristic; UAE, urinary albumin excretion.

© 2008 by the American Diabetes Association.

The costs of publication of this article were defrayed in part by the payment of page charges. This article must therefore be hereby marked "advertisement" in accordance with 18 U.S.C. Section 1734 solely to indicate this fact.

(CTGF) was first identified in conditioned media of endothelial cells as a 36- to 38-kDa polypeptide containing chemotactic activity toward fibroblasts (2). CTGF has been acknowledged as a key factor in extracellular matrix production and other profibrotic activity mediated by transforming growth factor- $\beta$ 1 (3). Other biological functions of CTGF include angiogenesis, chondrogenesis, osteogenesis, and cell adhesion, migration, proliferation, and differentiation (4).

Recently, CTGF has emerged as an important factor in diabetic nephropathy. In renal cells, CTGF is induced by high glucose, and it is critically involved in diabetes-associated changes such as extracellular matrix synthesis, cell migration, and epithelial-to-mesenchymal transition (5–8). Furthermore, upregulation of CTGF has been observed in human and experimental diabetic nephropathy (6,9–12), whereas the structure and function of the kidney are largely preserved in diabetic mice with hemizygous CTGF deletion and in diabetic mice treated with CTGF antibody or CTGF antisense oligonucleotides (13–15).

CTGF is a secreted protein and can be detected in biological fluids. Previous small studies have reported that both urinary CTGF excretion and plasma CTGF levels are elevated in patients with diabetic nephropathy (16–19). Recently, we have shown in a large cross-sectional study of patients with type 1 diabetes that urinary CTGF excretion is associated with urinary albumin excretion (UAE) and associated inversely with glomerular filtration rate (GFR), both important clinical markers for severity of renal disease (20). In aggregate, these data suggest that CTGF might be a useful marker of renal deterioration in patients with diabetic nephropathy.

Because all previous clinical studies addressing CTGF as a biomarker were performed in cross-sectional designs, the possible prognostic value of CTGF levels in diabetic nephropathy still has remained elusive. Therefore, we set out to evaluate whether plasma CTGF might

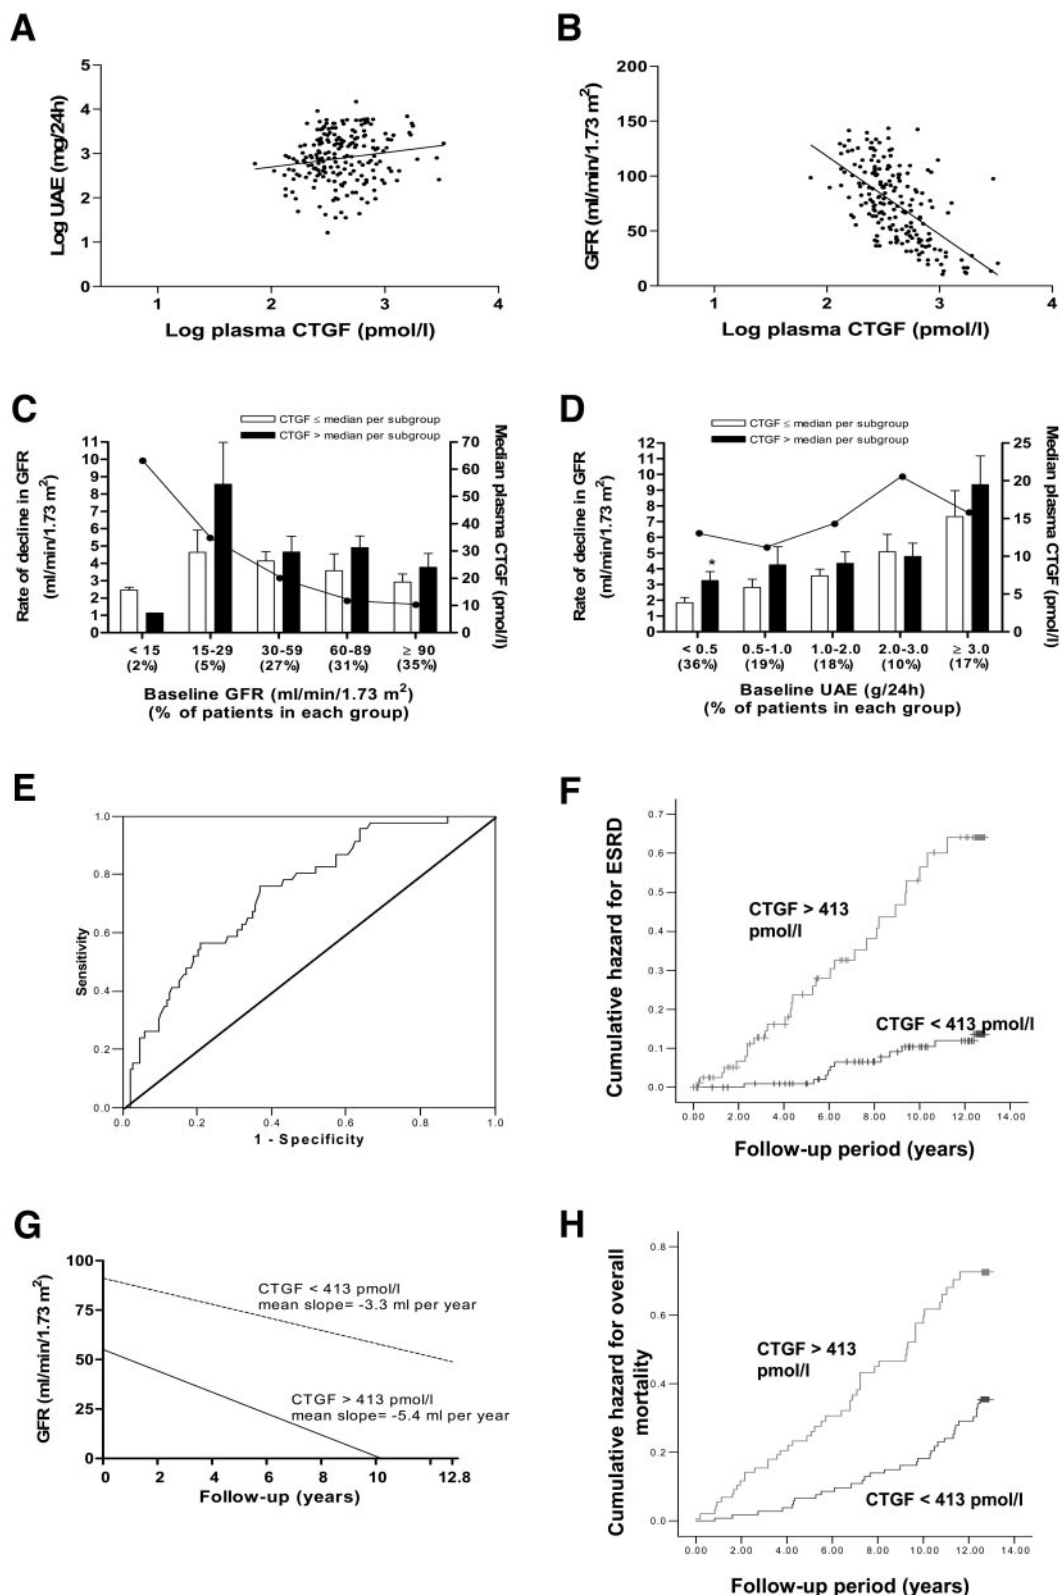

**Figure 1**—Baseline plasma CTGF in patients with diabetic nephropathy. A: Log plasma CTGF correlates with log UAE ( $R = 0.16$ ,  $P = 0.02$ ). B: Log plasma CTGF correlates inversely with GFR ( $R = -0.58$ ,  $P < 0.001$ ). C: Analysis per KDOQI subgroup for chronic kidney disease. Within each subgroup, patients with plasma CTGF above the median tend to have a higher rate of decline in GFR. D: Analysis per subgroup for UAE. Within each subgroup, patients with plasma CTGF above the median tend to have a higher rate of decline in GFR. \* $P < 0.05$  versus group with plasma CTGF below the median. E: Area under the ROC curve for prediction of ESRD by plasma CTGF is 0.74. With a cutoff value for plasma CTGF of 413 pmol/l, ESRD is predicted with a sensitivity of 73% and a specificity of 63%. F: Kaplan-Meier curve for prediction of ESRD. Cumulative hazard for ESRD is higher in patients with plasma CTGF  $> 413$  pmol/l than in patients with plasma CTGF  $< 413$  pmol/l. Log-rank test,  $P < 0.001$ . G: Graphic

predict loss of GFR, ESRD, and mortality in a prospective study of 386 type 1 diabetic patients with and without diabetic nephropathy during a follow-up period of 12.8 years.

## RESEARCH DESIGN AND METHODS

Patients with type 1 diabetic nephropathy attending the outpatient clinic of Steno Diabetes Center in 1993 were invited to participate in a case-control study (21,22). Type 1 diabetes was considered present if the age at onset of diabetes was  $\leq 35$  years and time to definite insulin therapy was  $\leq 1$  year. Patients were categorized as having diabetic nephropathy if they had persistent albuminuria ( $>300$  mg/day) in at least two of three consecutive 24-h urine collections, diabetic retinopathy, and no other kidney or renal tract disease (23). Patients with equally long-lasting type 1 diabetes ( $>15$  years) and persistent normoalbuminuria ( $<30$  mg/day), who were matched for sex, age, and duration of diabetes, served as control subjects. Thus, 198 patients with nephropathy and 188 patients with normoalbuminuria were included in the study. The study was approved by the local ethics committee, in accordance with the Declaration of Helsinki, and all patients gave their informed written consent.

Investigations were performed in the morning after an overnight fast. Blood pressure was measured twice after at least 10 min of rest in the supine position. UAE was measured by an enzyme immunoassay from 24-h urine collections. Plasma creatinine was assessed by a kinetic Jaffé method. GFR was measured after a single intravenous injection of  $^{51}\text{Cr}$ -EDTA (3.7 MBq) by following the plasma clearance of the tracer for 4 h (24). Linear regression of yearly GFR measurements in each individual was used to estimate rate of decline in GFR. In normoalbuminuric patients, GFR was estimated by the Modification of Diet in Renal Disease equation (25).

Diabetic retinopathy was assessed by fundus photography and graded as nil, simplex, or proliferative retinopathy. Patients were interviewed using the World

Health Organization cardiovascular questionnaire. Major cardiovascular events were diagnosed as a history of stroke and/or myocardial infarction. Smoking was defined as smoking  $\geq 1$  cigarettes/cigars/pipes a day.

In a prospective observational study design, patients were followed up until 1 November 2006 or until death ( $n = 99$ ) or emigration ( $n = 3$ ). If a patient had died, the date of death was recorded, and the cause of death was obtained from the death certificate. Additional available information from necropsy reports was included. All deaths were classified as cardiovascular deaths unless an unequivocal noncardiovascular cause was established. Information about the date of ESRD was obtained from patient records or discharge letters from other hospitals. ESRD was defined as the need for dialysis or renal transplantation.

## Enzyme-linked immunosorbent assay for plasma CTGF

CTGF was measured in plasma samples drawn at study entry that had been stored at  $-80^{\circ}\text{C}$  at the Steno Diabetes Center. Storage time and freeze-thaw cycles of all samples were identical. CTGF was determined by a sandwich enzyme-linked immunosorbent assay using monoclonal antibodies against two distinct epitopes on the N-terminal part of human CTGF (FibroGen, South San Francisco, CA) as described previously (18,20).

## Statistical analysis

Normally distributed variables are expressed as means  $\pm$  SD. UAE, plasma creatinine, and plasma CTGF were logarithmically transformed before analysis and are expressed as medians (interquartile range).

Comparisons between groups were performed by unpaired Student's  $t$  test or Mann-Whitney test. Multiple logistic regression analysis was used to identify the contribution of parameters to risk of diabetic nephropathy. Pearson and Spearman correlations and forward stepwise regression analysis were used to identify parameters that correlated with rate of decline in GFR. All time-to-event variables

were analyzed using log-rank tests and were displayed on Kaplan-Meier plots according to levels being above or below the cutoff value, as determined by the receiver operating characteristic (ROC) curve. The cutoff value with the most discriminative value was defined as the point of the ROC curve closest to the left upper corner ( $d = \sqrt{[(1 - \text{specificity})^2 + (1 - \text{sensitivity})^2]}$ ).

Cox proportional hazards regression models with forward selection were used to evaluate the contribution of baseline covariates to ESRD and overall mortality. For this, continuous variables were standardized for 1-SD difference. In the Cox regression model for ESRD, baseline covariates that were associated with rate of decline in GFR ( $P < 0.1$ ) were entered into the model. These covariates were plasma CTGF, sex, duration of diabetes, UAE, GFR, and systolic blood pressure. In the Cox regression models for cardiovascular and overall mortality, the following prespecified baseline covariates were entered into the model: plasma CTGF, sex, age, smoking, UAE, GFR, A1C, history of cardiovascular event, and systolic blood pressure. Results are given as hazard ratios (HRs) with 95% CI.

In all cases,  $P < 0.05$  was considered significant (two-tailed). All calculations were performed using SPSS (version 12.0; SPSS, Chicago, IL).

## RESULTS

### Plasma CTGF is increased in patients with diabetic nephropathy

General characteristics and baseline parameters of patients are summarized in Table 1. Plasma CTGF was higher in patients with diabetic nephropathy than in patients with normoalbuminuria (median 381 [interquartile range 270–630] vs. 235 [168–353] pmol/l;  $P < 0.001$ ). In patients with nephropathy, plasma CTGF correlated with UAE ( $R = 0.16$ ,  $P = 0.02$ ) and correlated inversely with GFR ( $R = -0.58$ ,  $P < 0.001$ ) (Fig. 1A and B). In these patients, plasma CTGF was higher in those receiving antihypertensive medication ( $n = 151$ ) compared with those not receiving antihypertensive medica-

*illustration of the relation between plasma CTGF and GFR at baseline and rate of decline in GFR during 12.8 years of follow-up. The mean rate of decline in GFR is higher in patients with high plasma CTGF ( $>413$  pmol/l; —,  $5.4 \pm 4.9$  ml/min per  $1.73\text{ m}^2$  per year) than in patients with low plasma CTGF ( $<413$  pmol/l; ---,  $3.3 \pm 3.5$  ml/min per  $1.73\text{ m}^2$  per year). Regression lines were computed from all available data points. The x-intercept value of 10.2 years for the high plasma CTGF group indicates mean time to ESRD. H: Kaplan-Meier curve for prediction of overall mortality. Cumulative hazard for overall mortality is higher in patients with plasma CTGF  $>413$  pmol/l than in patients with plasma CTGF  $<413$  pmol/l. Log-rank test,  $P < 0.001$ .*

**Table 1—Baseline parameters of 386 type 1 diabetic patients with or without diabetic nephropathy**

|                                         | Nephropathy     | Normoalbuminuria | P value |
|-----------------------------------------|-----------------|------------------|---------|
| General patient characteristics         |                 |                  |         |
| n (% men)                               | 198 (62)        | 188 (61)         | 0.84    |
| Age (years)                             | 41.0 ± 9.5      | 42.5 ± 9.9       | 0.14    |
| Duration of diabetes (years)            | 27.7 ± 8.0      | 26.8 ± 8.5       | 0.26    |
| BMI (kg/m <sup>2</sup> )                | 24.0 ± 3.3      | 23.7 ± 2.5       | 0.20    |
| Retinopathy (nil/simplex/proliferative) | 0/61/137        | 66/103/19        | <0.001  |
| A1C (%)                                 | 9.6 ± 1.5       | 8.5 ± 1.1        | <0.001  |
| Renal function                          |                 |                  |         |
| UAE (mg/24 h)                           | 794 (342–2,050) | 8 (5–13)         | —       |
| Plasma creatinine (μmol/l)              | 103 (82–134)    | 76 (69–83)       | <0.001  |
| GFR (ml/min per 1.73 m <sup>2</sup> )   | 74 ± 33         | 94 ± 16          | <0.001  |
| Cardiovascular characteristics          |                 |                  |         |
| Systolic blood pressure (mmHg)          | 151 ± 23        | 132 ± 18         | <0.001  |
| Diastolic blood pressure (mmHg)         | 86 ± 13         | 76 ± 10          | <0.001  |
| Smokers                                 | 99 (50)         | 81 (43)          | 0.17    |
| History of myocardial infarction        | 10 (5.1)        | 2 (1.1)          | 0.036   |
| History of stroke                       | 14 (7.1)        | 1 (0.5)          | 0.001   |
| CTGF levels                             |                 |                  |         |
| Plasma CTGF (pmol/l)                    | 381 (270–630)   | 235 (168–353)    | <0.001  |

Data are n (%), means ± SD, or median (interquartile range).

tion ( $n = 47$ ) (588 [289–697] vs. 333 [197–422] pmol/l;  $P = 0.01$ ), but this difference disappeared after adjustment for GFR. In patients with normoalbuminuria, plasma CTGF did not correlate with any of the clinical parameters.

### Plasma CTGF contributes to risk of diabetic nephropathy

After adjustment for duration of diabetes, BMI, systolic blood pressure, A1C, and GFR, a standardized increase of plasma CTGF resulted in 2.0-fold increased chance of diabetic nephropathy (odds ratio [OR] 2.0 [95% CI 1.5–2.8]). This result was comparable with the ORs for diabetic nephropathy of increased A1C (2.2 [1.6–2.9]) and systolic blood pressure (1.7 [1.5–2.9]) after adjustment for duration of diabetes, GFR, plasma CTGF, and systolic blood pressure or A1C, respectively.

### Baseline plasma CTGF correlates with rate of decline in GFR

In patients with nephropathy, the mean rate of decline in GFR was 4.3 ml/min per 1.73 m<sup>2</sup> per year. With rate of decline in GFR as a dependent variable, UAE was identified as the regression parameter with the strongest correlation ( $R = 0.43$ ,  $P < 0.001$ ). Applying significance cutoff at  $P < 0.05$ , baseline plasma CTGF was the next and only parameter significantly

contributing to an increase in this correlation, resulting in a cumulative  $R$  of 0.46 ( $P = 0.001$ ). Addition of other parameters did not significantly increase correlation with rate of decline in GFR. In particular, the effect of plasma CTGF concentration on this regression was independent of baseline GFR.

Similarly, in separate analysis of Kidney Disease Outcomes Quality Initiative (KDOQI) subgroups for chronic kidney disease, patients with plasma CTGF above the median of their particular subgroup tended to have a higher rate of decline in GFR, but this trend did not reach statistical significance (Fig. 1C). Also within subgroups stratified for UAE, a similar trend of a higher rate of decline in GFR was observed in patients with higher plasma CTGF levels (Fig. 1D).

**Table 2—Cox proportional hazards model for ESRD of baseline risk factors associated with rate of decline in GFR in patients with diabetic nephropathy**

|                                                              | HR (95% CI)       | P value |
|--------------------------------------------------------------|-------------------|---------|
| All patients with diabetic nephropathy ( $n = 198$ )         |                   |         |
| GFR (per 1-SD decrease = 34 ml/min per 1.73 m <sup>2</sup> ) | 3.13 (1.90–5.15)  | <0.001  |
| Sex (male vs. female)                                        | 2.52 (1.23–5.14)  | 0.01    |
| UAE (per 1-SD increase = 3.6-fold)                           | 2.08 (1.44–3.01)  | <0.001  |
| Plasma CTGF (per 1-SD increase = 1.9-fold)                   | 1.62 (1.05–2.50)  | 0.03    |
| Patients with nephrotic range albuminuria ( $n = 33$ )       |                   |         |
| Plasma CTGF (per 1-SD increase = 1.9-fold)                   | 4.53 (1.96–10.44) | <0.001  |

Adjusted for systolic blood pressure, duration of diabetes, and all other variables of this table.

### Baseline plasma CTGF predicts ESRD in diabetic nephropathy

At baseline, 6 of 198 patients with diabetic nephropathy had already developed ESRD. These patients were excluded from further prospective analyses. Area under the ROC curve for prediction of ESRD by plasma CTGF was 0.72, by UAE was 0.73, and by systolic blood pressure was 0.68. The optimal cutoff value for plasma CTGF (413 pmol/l) predicted ESRD with a sensitivity of 73% and a specificity of 63% (Fig. 1E).

During follow-up, 40 of 192 patients with nephropathy and none of the patients without nephropathy developed ESRD. Within the nephropathy group, development of ESRD occurred in a larger proportion of patients with plasma CTGF >413 pmol/l ( $P < 0.001$ ) (Fig. 1F). The rate of decline in GFR was higher in these patients than in those with plasma CTGF <413 pmol/l ( $5.4 \pm 4.9$  vs.  $3.3 \pm 3.5$  ml/min per 1.73 m<sup>2</sup> per year;  $P < 0.001$ ) (Fig. 1G).

In all patients with diabetic nephropathy, the covariate-adjusted HR of plasma CTGF for ESRD was 1.6 (95% CI 1.1–2.5) ( $P = 0.03$ ). In patients with nephrotic range albuminuria (>3 g/day), 17 of 32 patients developed ESRD, consistent with previous studies in type 1 and type 2 diabetes (26,27). In this subgroup, plasma CTGF was the only independent predictor of ESRD, with a covariate-adjusted HR of 4.5 (2.0–10.4) ( $P < 0.001$ ) (Table 2). In patients with non-nephrotic range albuminuria, the only independent predictor of ESRD was GFR (data not shown).

### Baseline plasma CTGF predicts mortality in diabetic nephropathy

Mortality in patients with nephropathy was 40%, of which 54% was due to cardiovascular mortality. In patients with diabetic nephropathy, area under the ROC curve for prediction of both overall mor-



**Table 3—Cox proportional hazards model of baseline risk factors for overall mortality in patients with diabetic nephropathy**

|                                                       | HR (95% CI)      | P value |
|-------------------------------------------------------|------------------|---------|
| Sex (male vs. female)                                 | 2.03 (1.18–3.48) | 0.011   |
| A1C (per 1-SD increase = 1.5%)                        | 1.47 (1.16–1.86) | 0.001   |
| Systolic blood pressure (per 1-SD increase = 22 mmHg) | 1.41 (1.10–1.80) | 0.007   |
| Plasma CTGF (per 1-SD increase = 1.9-fold)            | 1.39 (1.11–1.74) | 0.005   |
| Age (per 1-SD increase = 9.5 years)                   | 1.37 (1.10–1.69) | 0.004   |

Adjusted for smoking, history of major cardiovascular event, UAE, GFR, and all variables of this table.

tality and cardiovascular mortality by plasma CTGF was 0.66. A cutoff value for plasma CTGF of 413 pmol/l predicted overall mortality with optimal sensitivity and specificity (59 and 63%, respectively). A cutoff value for plasma CTGF of 419 pmol/l predicted cardiovascular mortality with optimal sensitivity and specificity (67 and 61%, respectively). Both cardiovascular mortality and overall mortality were higher in patients with plasma CTGF above either of these cutoff values ( $P < 0.001$ ) (overall mortality shown in Fig. 1H).

Significant independent baseline predictors of overall mortality in patients with nephropathy were sex, plasma CTGF, A1C, systolic blood pressure, and age. The covariate-adjusted HR of plasma CTGF for prediction of overall mortality was 1.4 (95% CI 1.1–1.7) ( $P = 0.005$ ) (Table 3). In the subpopulation of nephrotic range albuminuric patients, this HR was 2.3 (1.2–4.4) ( $P = 0.01$ ). As for cardiovascular mortality, this was predicted independently by history of major cardiovascular event, systolic blood pressure, and GFR, but not by plasma CTGF.

In normoalbuminuric patients, overall mortality was 11%, of which 42% was due to cardiovascular mortality. Although plasma CTGF at baseline was higher in normoalbuminuric patients who died during follow-up compared with those who were still in the study (median 274 [interquartile range 202–392] vs. 230 [164–343] pmol/l,  $P = 0.034$ ), plasma CTGF was an independent predictor of neither overall mortality nor cardiovascular mortality in patients with normoalbuminuria.

**CONCLUSIONS**— The major findings in this study are that the plasma CTGF level correlates with rate of decline in GFR and that it is an independent predictor of both ESRD and mortality in patients with type 1 diabetic nephropathy.

Baseline plasma CTGF was higher in patients with diabetic nephropathy than in patients with normoalbuminuria. This result is in accordance with our previous observations in a smaller study, in which plasma CTGF levels were increased in 10 patients with diabetic nephropathy (18). Although the correlations between plasma CTGF and UAE ( $R = 0.16$ ) and between plasma CTGF and GFR ( $R = -0.58$ ) are relatively weak, the association of diabetic nephropathy with plasma CTGF is of strength similar to its association with the established risk factors A1C and systolic blood pressure. Of interest, the OR for diabetic nephropathy of elevated plasma CTGF is of magnitude comparable to that of increased urinary CTGF excretion observed in a previous study (OR = 2.0 and 2.3, respectively) (20). However, because urine and plasma samples have not been available from the same patients thus far, the relation between CTGF levels in plasma and urine remains to be determined in future studies.

In normoalbuminuric patients, renal function remained well preserved, and progression to ESRD was not observed during the follow-up period. However, in patients with diabetic nephropathy, renal function deteriorated progressively, and 21% developed ESRD. Consistent with previous reports, rate of decline in patients with overt diabetic nephropathy was most strongly associated with UAE ( $R = 0.43$ ) (28,29). Of interest, addition of plasma CTGF increased this correlation to a cumulative  $R$  of 0.46, whereas no such increase was observed with addition of any other baseline parameter, including baseline GFR. Accordingly, patients with high plasma CTGF levels had a steeper slope of decline in GFR than those with low plasma CTGF (cutoff 413 pmol/l).

Baseline plasma CTGF was identified as an independent parameter, but its as-

sociation with decline in renal function was much stronger in patients with severe proteinuria than in those with mild proteinuria. Separate analysis of patients with nephrotic range albuminuria revealed that plasma CTGF was the only independent predictor of ESRD, whereas differences even in GFR or UAE no longer predicted outcome in this subgroup. On the other hand, despite overlapping plasma CTGF levels, no such correlation or predictive value was found in patients with normoalbuminuria. It thus appears that plasma CTGF has unique potential as a prognostic biomarker of renal function decline, especially in diabetic patients with severe proteinuria.

Previously, we observed that urinary CTGF excretion is elevated only in macroalbuminuric and not in microalbuminuric and normoalbuminuric patients (20). Together with the well-established profibrotic effects of CTGF on tubular epithelial cells (8,30), these observations suggest that progressive loss of renal function might relate to excess plasma CTGF leaking into the urine in patients with severe proteinuria. It would be interesting to study whether levels of CTGF in unselected normoalbuminuric or microalbuminuric patients could identify subjects at high risk for progression of albuminuria, but this could not be investigated in the present study as the normoalbuminuric control group was selected for having long diabetes duration and thus low risk of progression of albuminuria. A microalbuminuric group was not available for this study.

In summary, addition of plasma CTGF to conventional risk factor assessment significantly improves prediction of ESRD and mortality in patients with overt type 1 diabetic nephropathy. Its unique predictive value for disease progression in patients with diabetic nephropathy, in particular those with heavy proteinuria, suggests that plasma CTGF might have clinical application as a biomarker. In addition, our findings lend further support to the notion that CTGF is an important pathogenic factor in progression of human diabetic nephropathy, consistent with previous observations in preclinical models.

**Acknowledgments**— This study was supported by the Dutch Kidney Foundation (C05.2144) and the Netherlands Organization for Scientific Research (017.003.037).

We thank Lotte Wieten for technical assistance and Jack Wetzels for helpful discussions.

Part of this study were presented in abstract form at Renal Week 2007: American Society of Nephrology Annual Meeting, San Francisco, California, 31 October–5 November 2007.

## References

- Locatelli F, Pozzoni P, Del Vecchio L: Renal replacement therapy in patients with diabetes and end-stage renal disease. *J Am Soc Nephrol* 15 (Suppl 1):S25–S29, 2004
- Bradham DM, Igarashi A, Potter RL, Grotendorst GR: Connective tissue growth factor: a cysteine-rich mitogen secreted by human vascular endothelial cells is related to the SRC-induced immediate early gene product CEF-10. *J Cell Biol* 114: 1285–1294, 1991
- Leask A, Abraham DJ: TGF-beta signaling and the fibrotic response. *FASEB J* 18:816–827, 2004
- Perbal B: CCN proteins: multifunctional signalling regulators. *Lancet* 363:62–64, 2004
- Murphy M, Godson C, Cannon S, Kato S, Mackenzie HS, Martin F, Brady HR: Suppression subtractive hybridization identifies high glucose levels as a stimulus for expression of connective tissue growth factor and other genes in human mesangial cells. *J Biol Chem* 274:5830–5834, 1999
- Riser BL, deNichilo M, Cortes P, Baker C, Grondin JM, Yee J, Narins RG: Regulation of connective tissue growth factor activity in cultured rat mesangial cells and its expression in experimental diabetic glomerulosclerosis. *J Am Soc Nephrol* 11:25–38, 2000
- Blom IE, van Dijk AJ, Wieten L, Duran K, Ito Y, Kleij L, deNichilo M, Rabelink TJ, Weening JJ, Aten J, Goldschmeding R: In vitro evidence for differential involvement of CTGF, TGFβ, and PDGF-BB in mesangial response to injury. *Nephrol Dial Transplant* 16:1139–1148, 2001
- Burns WC, Twigg SM, Forbes JM, Pete J, Tikellis C, Thallas-Bonke V, Thomas MC, Cooper ME, Kantharidis P: Connective tissue growth factor plays an important role in advanced glycation end product-induced tubular epithelial-to-mesenchymal transition: implications for diabetic renal disease. *J Am Soc Nephrol* 17:2484–2494, 2006
- Ito Y, Aten J, Bende RJ, Oemar BS, Rabelink TJ, Weening JJ, Goldschmeding R: Expression of connective tissue growth factor in human renal fibrosis. *Kidney Int* 53:853–861, 1998
- Roestenberg P, van Nieuwenhoven FA, Joles JA, Trischberger C, Martens PP, Oliver N, Aten J, Hoppener JW, Goldschmeding R: Temporal expression profile and distribution pattern indicate a role of connective tissue growth factor (CTGF/CCN-2) in diabetic nephropathy in mice. *Am J Physiol* 290:F1344–F1354, 2006
- Adler SG, Kang SW, Feld S, Cha DR, Barba L, Striker L, Striker G, Riser BL, Lapage J, Nast CC: Glomerular mRNAs in human type 1 diabetes: biochemical evidence for microalbuminuria as a manifestation of diabetic nephropathy. *Kidney Int* 60:2330–2336, 2001
- Wahab NA, Schaefer L, Weston BS, Yianikouris O, Wright A, Babelova A, Schaefer R, Mason RM: Glomerular expression of thrombospondin-1, transforming growth factor β and connective tissue growth factor at different stages of diabetic nephropathy and their interdependent roles in mesangial response to diabetic stimuli. *Diabetologia* 48:2650–2660, 2005
- Guha M, Xu ZG, Tung D, Lanting L, Natarajan R: Specific down-regulation of connective tissue growth factor attenuates progression of nephropathy in mouse models of type 1 and type 2 diabetes. *FASEB J* 21:3355–3368, 2007
- Flyvbjerg A, Khatir D, Jensen LJN, Lomongsod E, Liu DY, Rasch R, Usinger WR: Long-term renal effects of a neutralizing connective tissue growth factor (CTGF)-antibody in obese type 2 diabetic mice (Abstract). *J Am Soc Nephrol* 15:261A, 2004
- Goldschmeding R, Roestenberg P, Joles JA, Lyons KM, van Nieuwenhoven FA: Diabetic GBM thickening is CTGF-dependent and involves reduced MMP-activity (Abstract). *J Am Soc Nephrol* 17: 128A, 2006
- Riser BL, Cortes P, deNichilo M, Deshmukh PV, Chahal PS, Mohammed AK, Yee J, Kahkonen D: Urinary CCN2 (CTGF) as a possible predictor of diabetic nephropathy: preliminary report. *Kidney Int* 64:451–458, 2003
- Gilbert RE, Akdeniz A, Weitz S, Usinger WR, Molineaux C, Jones SE, Langham RG, Jerums G: Urinary connective tissue growth factor excretion in patients with type 1 diabetes and nephropathy. *Diabetes Care* 26:2632–2636, 2003
- Roestenberg P, van Nieuwenhoven FA, Wieten L, Boer P, Diekman T, Tiller AM, Wiersinga WM, Oliver N, Usinger W, Weitz S, Schlingemann RO, Goldschmeding R: Connective tissue growth factor is increased in plasma of type 1 diabetic patients with nephropathy. *Diabetes Care* 27:1164–1170, 2004
- Andersen S, van Nieuwenhoven FA, Tarnow L, Rossing P, Rossing K, Wieten L, Goldschmeding R, Parving HH: Reduction of urinary connective tissue growth factor by losartan in type 1 patients with diabetic nephropathy. *Kidney Int* 67: 2325–2329, 2005
- Nguyen TQ, Tarnow L, Andersen S, Hovind P, Parving HH, Goldschmeding R, van Nieuwenhoven FA: Urinary connective tissue growth factor excretion correlates with clinical markers of renal disease in a large population of type 1 diabetic patients with diabetic nephropathy. *Diabetes Care* 29:83–88, 2006
- Tarnow L, Cambien F, Rossing P, Nielsen FS, Hansen BV, Lecerf L, Poirier O, Daniilov S, Parving HH: Lack of relationship between an insertion/deletion polymorphism in the angiotensin I-converting enzyme gene and diabetic nephropathy and proliferative retinopathy in IDDM patients. *Diabetes* 44:489–494, 1995
- Tarnow L, Cambien F, Rossing P, Nielsen FS, Hansen BV, Lecerf L, Poirier O, Daniilov S, Boelskifte S, Parving HH: Insertion/deletion polymorphism in the angiotensin-I-converting enzyme gene is associated with coronary heart disease in IDDM patients with diabetic nephropathy. *Diabetologia* 38:798–803, 1995
- Parving HH, Mauer M, Ritz E: Diabetic Nephropathy. In *Brenner & Rector's The Kidney*. 7th ed. Brenner BM, Ed. Philadelphia, Saunders, p. 1777–1818, 2004
- Brochner-Mortensen J, Rodbro P: Selection of routine method for determination of glomerular filtration rate in adult patients. *Scand J Clin Lab Invest* 36:35–43, 1976
- Levey AS, Bosch JP, Lewis JB, Greene T, Rogers N, Roth D: A more accurate method to estimate glomerular filtration rate from serum creatinine: a new prediction equation. Modification of Diet in Renal Disease Study Group. *Ann Intern Med* 130:461–470, 1999
- Keane WF, Brenner BM, de ZD, Grunfeld JP, McGill J, Mitch WE, Ribeiro AB, Shahinfar S, Simpson RL, Snapinn SM, Toto R: The risk of developing end-stage renal disease in patients with type 2 diabetes and nephropathy: the RENAAL study. *Kidney Int* 63:1499–1507, 2003
- Hovind P, Tarnow L, Rossing P, Carstensen B, Parving HH: Improved survival in patients obtaining remission of nephrotic range albuminuria in diabetic nephropathy. *Kidney Int* 66:1180–1186, 2004
- Hovind P, Rossing P, Tarnow L, Smidt UM, Parving HH: Progression of diabetic nephropathy. *Kidney Int* 59:702–709, 2001
- Jacobsen P, Rossing K, Tarnow L, Rossing P, Mallet C, Poirier O, Cambien F, Parving HH: Progression of diabetic nephropathy in normotensive type 1 diabetic patients. *Kidney Int Suppl* 71:S101–S105, 1999
- Shi Y, Tu Z, Wang W, Li Q, Ye F, Wang J, Qiu J, Zhang L, Bu H, Li Y: Homologous peptide of connective tissue growth factor ameliorates epithelial to mesenchymal transition of tubular epithelial cells. *Cytokine* 36:35–44, 2006
